# Supplementary material
Source: MDPI journal article supplement (https://www.mdpi.com/1424-8247/16/10/1496)
Supplement: s1 [file s1]

**Table S1:** Manuscript quality analyzed using the 25 items of the CONSORT guidelines. Scoring: "0", "1", "0.5" or "X" on the irrelevant item.

| CONSORT GUIDELINES ANALYSIS           |     |     |     |     |   |   |     |     |   |    |     |     |     |     |    |    |    |     |    |    |    |    |    |     |    |       |    |
|---------------------------------------|-----|-----|-----|-----|---|---|-----|-----|---|----|-----|-----|-----|-----|----|----|----|-----|----|----|----|----|----|-----|----|-------|----|
| Item order                            | 1   | 2   | 3   | 4   | 5 | 6 | 7   | 8   | 9 | 10 | 11  | 12  | 13  | 14  | 15 | 16 | 17 | 18  | 19 | 20 | 21 | 22 | 23 | 24  | 25 | TOTAL | %  |
| Bernaerts et al., 2020 [28]           | 1   | 1   | 1   | 1   | 1 | 1 | 0   | 0.5 | 0 | 0  | 1   | 0.5 | 0.5 | 0.5 | 1  | 1  | 1  | 1   | x  | 1  | 1  | 1  | 1  | 1   | 1  | 19    | 79 |
| Wichers et al.,2019 [29]              | 0   | 1   | 1   | 1   | 1 | 1 | 0.5 | 0.5 | 1 | 0  | 1   | 1   | 0.5 | 0   | 0  | 1  | 1  | 1   | 1  | 1  | 1  | 1  | 0  | 1   | 1  | 18,5  | 74 |
| Ballester et al., 2019 [30]           | 0.5 | 1   | 0.5 | 1   | 1 | 1 | 0.5 | 1   | 0 | 0  | 1   | 1   | 1   | 0.5 | 1  | 1  | 1  | x   | x  | 1  | 1  | 1  | 1  | 1   | 1  | 19    | 83 |
| Pretzsch et al., 2019 [31]            | 0.5 | 1   | 1   | 1   | 1 | 1 | 0   | 0.5 | 0 | 0  | 1   | 1   | 0.5 | 0   | 0  | 1  | 1  | 1   | x  | 1  | 1  | 1  | 1  | 1   | 1  | 17,5  | 73 |
| Owada et al., 2019 [32]               | 0   | 1   | 1   | 1   | 1 | 1 | 0.5 | 0.5 | 0 | 0  | 1   | 0.5 | 0.5 | 0.5 | 1  | 1  | 1  | 1   | x  | 1  | 1  | 1  | 1  | 1   | 1  | 19,5  | 81 |
| Bolognani et al., 2019 [33]           | 0   | 1   | 1   | 1   | 1 | 1 | 1   | 0   | 0 | 0  | 1   | 0   | 1   | 0.5 | 1  | 1  | 1  | 1   | 1  | 1  | 1  | 1  | 1  | 1   | 0  | 18,5  | 74 |
| Chez et al., 2018 [34]                | 0.5 | 1   | 0.5 | 0.5 | 1 | 1 | 0.5 | 0   | 0 | 0  | 1   | 0.5 | 1   | 0   | 0  | 1  | 1  | 0   | 1  | 1  | 1  | 1  | 0  | 0   | 0  | 13.5  | 54 |
| Quintana et al.,2017 [35]             | 0.5 | 1   | 0.5 | 1   | 1 | 1 | 0.5 | 1   | 1 | 1  | 1   | 1   | 1   | 0.5 | 0  | 1  | 1  | 1   | 1  | 1  | 1  | 1  | 1  | 1   | 0  | 21    | 84 |
| Kanat et al.,2017 [36]                | 0   | 1   | 0.5 | 1   | 1 | 1 | 0.5 | 1   | 1 | 1  | 1   | 1   | 0   | 0   | 1  | 1  | 1  | 1   | 0  | 1  | 0  | 1  | 1  | 0   | 0  | 17    | 68 |
| Zamzow et al., 2017 [37]              | 0   | 1   | 0.5 | 1   | 1 | 1 | 0   | 0.5 | 0 | 0  | 0.5 | 1   | 1   | 0   | 1  | 1  | 1  | x   | 0  | 1  | 0  | 0  | 0  | 0   | 1  | 12,5  | 52 |
| Umbricht et al., 2017 [38]            | 0.5 | 1   | 0.5 | 1   | 1 | 1 | 0.5 | 0   | 0 | 0  | 0.5 | 0.5 | 1   | 0   | 1  | 1  | 1  | 1   | 1  | 1  | 1  | 1  | 1  | 0   | 1  | 17.5  | 70 |
| Althaus et al.,2016 [39]              | 0.5 | 1   | 0.5 | 1   | 1 | 1 | 0   | 0   | 0 | 0  | 1   | 1   | 0.5 | 0   | 1  | 1  | 1  | 1   | x  | 1  | 1  | 1  | 0  | 0   | 1  | 15.5  | 64 |
| Zamzow et al., 2016 [40]              | 0.5 | 1   | 0.5 | 1   | 1 | 1 | 0   | 0   | 0 | 0  | 0.5 | 1   | 0.5 | 0   | 1  | 1  | 1  | 1   | 0  | 1  | 1  | 1  | 0  | 0   | 1  | 15    | 60 |
| Althaus et al., 2015 [41]             | 0.5 | 1   | 0.5 | 1   | 1 | 1 | 0.5 | 0   | 0 | 0  | 0.5 | 1   | 1   | 0.5 | 1  | 1  | 1  | 1   | 0  | 1  | 0  | 1  | 1  | 1   | 0  | 16.5  | 66 |
| Watanabe et al., 2015 [42]            | 0   | 1   | 0.5 | 1   | 1 | 1 | 1   | 1   | 0 | 1  | 1   | 0.5 | 1   | 0   | 1  | 1  | 1  | 1   | 1  | 1  | 1  | 1  | 1  | 1   | 1  | 21    | 84 |
| Auyeung et al., 2015 [43]             | 0   | 1   | 0.5 | 1   | 1 | 1 | 0.5 | 0.5 | 0 | 0  | 0.5 | 0.5 | 1   | 0   | 1  | 1  | 1  | 1   | 1  | 1  | 1  | 1  | 0  | 1   | 0  | 16.5  | 66 |
| McDougle et al., 1996 [44]            | 0.5 | 0.5 | 0.5 | 0.5 | 1 | 1 | 0   | 0   | 0 | 0  | 0.5 | 0.5 | 0.5 | 0.5 | 1  | 1  | 1  | 0   | 1  | 0  | 1  | 1  | 0  | 0   | 0  | 12    | 48 |
| Hollander et al., 2012 [45]           | 1   | 1   | 1   | 0.5 | 1 | 1 | 0.5 | 0   | 0 | 0  | 0.5 | 0.5 | 1   | 0,5 | 1  | 1  | 1  | 0.5 | 1  | 1  | 1  | 1  | 0  | 0.5 | 0  | 16.5  | 66 |
| Willemssen-Swinkels et al., 1995 [46] | 0.5 | 1   | 1   | 0.5 | 1 | 1 | 0.5 | 0   | 0 | 0  | 1   | 0.5 | 1   | 0.5 | 1  | 1  | 1  | 1   | 1  | 1  | 1  | 1  | 0  | 0   | 1  | 17.5  | 70 |
